# Supplementary material for: Association between caffeine consumption and bone mineral density in children and adolescent: Observational and Mendelian randomization study
Source: PubMed Central journal article supplement (PMC10309635; doi:10.1371/journal.pone.0287756), 2023-06-29

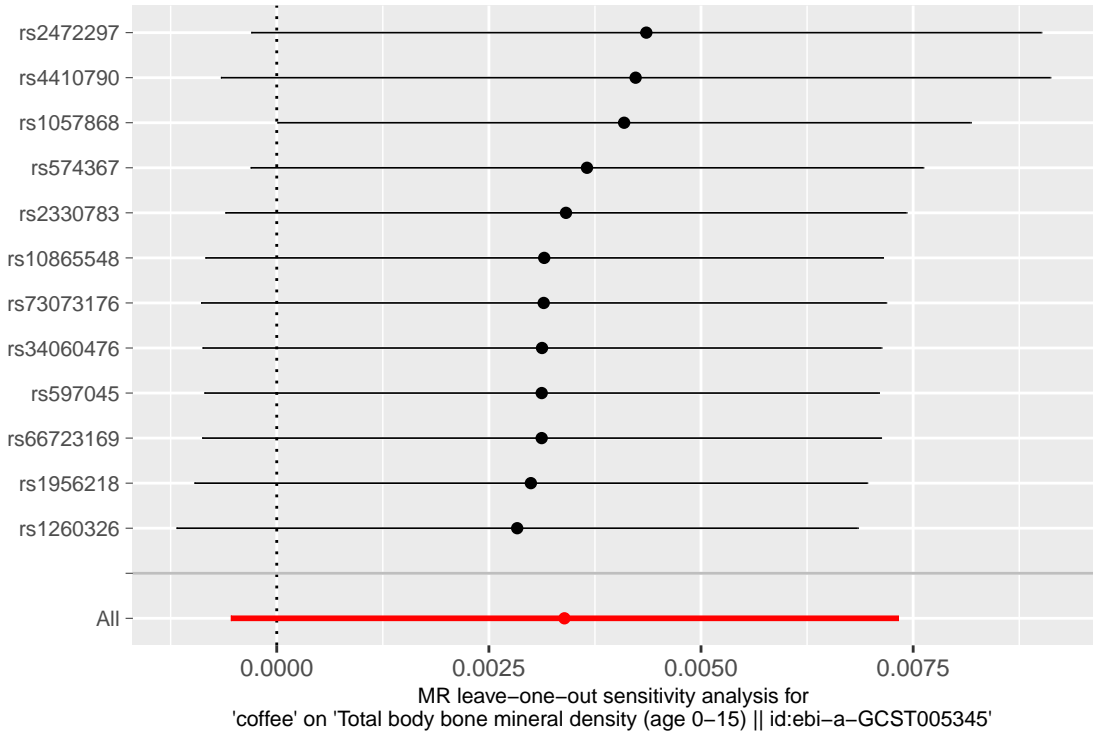

Supplement: pone.0287756.s003.pdf [file pone.0287756.s003.pdf]
